# Supplementary material
Source: Springer Nature journal article supplement (https://www.springermedizin.de/resource/supplementary/12913_2013_2988_MOESM1_ESM.pdf/9532628)
Supplement: MOESM1 [file 9532628]

Year 2005

Year 2005

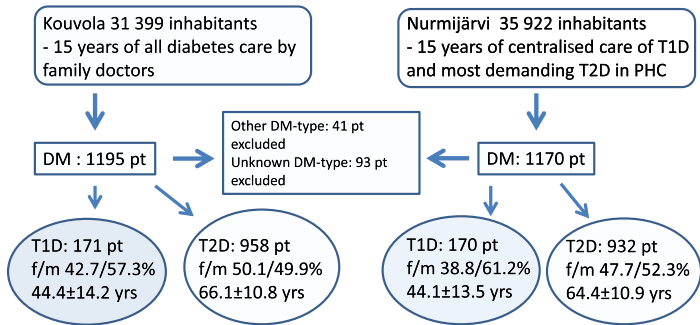

Comparison of:

- Costs of specialist care of diabetes
- Costs of PHC of diabetes
- Costs of overall care of diabetes
- Quality of follow-up of diabetes
- Laboratory and clinical data of diabetic patients
- Patient satisfaction (DM 1)

Year 2010

Year 2010
